# Supplementary material
Source: PubMed Central journal article supplement (PMC5683852)
Supplement: NIHMS912543-supplement-11.pdf [file NIHMS912543-supplement-11.pdf]

**Table S1. Basic kinetic parameters for AA and AA-PE oxygenation by 15LO1, 15LO2 and LoxA in the absence and in the presence of PEBP1, Related to Figure 6.**

| Enzyme | Sample ID                    | V <sub>max</sub><br>Pmole/min | V <sub>max</sub><br>p value<br>vs<br>"no<br>PEBP1" | K <sub>M</sub> mM | K <sub>M</sub><br>p value<br>vs "no<br>PEBP1" | K <sub>cat</sub> *10 <sup>-2</sup><br>s <sup>-1</sup> | K <sub>cat</sub> /K <sub>M</sub> *10 <sup>-3</sup><br>(mM S) <sup>-1</sup> | N |
|--------|------------------------------|-------------------------------|----------------------------------------------------|-------------------|-----------------------------------------------|-------------------------------------------------------|----------------------------------------------------------------------------|---|
| 15LO1  | Free AA<br>no<br>PEBP1       | 49.5 ± 9.1                    |                                                    | 150.9 ± 41.3      |                                               | 41.2                                                  | 2.7                                                                        | 3 |
| 15LO1  | Free AA<br>plus<br>PEBP1     | 33.4 ± 5.3                    | 0.224                                              | 65.7 ± 20.4       | 0.178                                         | 27.8                                                  | 4.2                                                                        | 3 |
| 15LO1  | AA-PE<br>no<br>PEBP1         | 1.9 ± 0.5                     |                                                    | 41.3 ± 17.2       |                                               | 0.08                                                  | 0.019                                                                      | 6 |
| 15LO1  | AA-PE<br>plus<br>PEBP1       | 2.7 ± 0.7                     | 0.011                                              | 41.4 ± 11.4       | 0.986                                         | 0.11                                                  | 0.027                                                                      | 6 |
| 15LO2  | Free AA<br>no<br>PEBP1       | 228.2 ±<br>35.1               |                                                    | 37.3 ± 7.2        |                                               | 47.5                                                  | 12.7                                                                       | 3 |
| 15LO2  | Free AA<br>plus<br>PEBP1     | 285.3 ±<br>61.8               | 0.236                                              | 62.4 ± 12.0       | 0.036                                         | 59.4                                                  | 9.5                                                                        | 3 |
| 15LO2  | AA-PE<br>no<br>PEBP1         | 14.5 ± 7.9                    |                                                    | 13.2 ± 5.5        |                                               | 0.6                                                   | 0.5                                                                        | 8 |
| 15LO2  | AA-PE<br>plus<br>PEBP1       | 33.0 ± 13.3                   | 0.003                                              | 7.7 ± 3.8         | 0.038                                         | 1.4                                                   | 1.8                                                                        | 7 |
| LoxA   | Free AA<br>no<br>PEBP1       | 78.4 ± 26.4                   |                                                    | 362.5 ± 124.9     |                                               | 65.3                                                  | 1.8                                                                        | 4 |
| LoxA   | Free AA<br>plus<br>PEBP1     | 126.6 ±<br>19.6               | 0.066                                              | 442.1 ± 84.5      | 0.265                                         | 105.5                                                 | 2.4                                                                        | 3 |
| LoxA   | AA-PE<br>no<br>PEBP1         | 1.8 ± 0.7                     |                                                    | 109.9 ± 65.4      |                                               | 0.08                                                  | 0.007                                                                      | 3 |
| LoxA   | AA-<br>PEBP<br>plus<br>PEBP1 | 1.1 ± 0.3                     | 0.176                                              | 80.6 ± 37.2       | 0.575                                         | 0.02                                                  | 0.006                                                                      | 3 |

Data are mean ± SD

**Table S2. “Multiple docking” calculations of arachidonic acid (AA) to PEBP1 mutants, Related to Figure 6.**

|                                                   | <b>wt PEBP1 (human PEBP1, 1beh)</b> | <b>Truncated C-terminal helix (175-186)</b> | <b>P112E mutant PEBP1</b>   |
|---------------------------------------------------|-------------------------------------|---------------------------------------------|-----------------------------|
| <b>ENERGY (<math>\Delta G</math>, kcal/mol)**</b> | -5.7 $\pm$ 0.4                      | -5.4 $\pm$ 0.4                              | -5.2 $\pm$ 0.4              |
|                                                   | -5.5 $\pm$ 0.1                      | -5.4 $\pm$ 0.2                              | -5.2 $\pm$ 0.3              |
|                                                   | -5.1 $\pm$ 0.5                      | -4.4 $\pm$ 0.2                              | -4.8 $\pm$ 0.3              |
|                                                   | -4.4 $\pm$ 0.3                      | -4.7 $\pm$ 0.2                              | -4.8 $\pm$ 0.0              |
|                                                   | -4.3 $\pm$ 0.2                      | -4.7 $\pm$ 0.1                              | -4.9 $\pm$ 0.2              |
|                                                   | -4.1 $\pm$ 0.3                      | --                                          | -4.1 $\pm$ 0.1              |
|                                                   | -3.7 $\pm$ 0.4                      | --                                          | -4.1 $\pm$ 0.4 <sup>#</sup> |
|                                                   | -3.5 $\pm$ 0.2                      | --                                          | -4.2 $\pm$ 0.6              |
|                                                   | -3.5 $\pm$ 0.3                      | -4.5 $\pm$ 0.2                              | -4.3 $\pm$ 0.4              |
| <b>Total energy (kcal/mol)</b>                    | -39.8 $\pm$ 2.7                     | -29.1 $\pm$ 1.3                             | -37.5 $\pm$ 2.7             |
| <b><math>\Delta\Delta G</math> (a)(kcal/mol)</b>  | <b>0</b>                            | <b>10.7</b>                                 | <b>2.3</b>                  |
| <b>AA interaction with PEBP1<sup>†</sup></b>      | 76                                  | 35                                          | 38                          |
| <b>Number of interactions present in wt*</b>      | 76                                  | 30                                          | 32                          |

(a)  $\Delta\Delta G$  = change in binding free energy with respect to that of wt PEBP1 (i.e.  $\Delta G$  (mutant) –  $\Delta G$  (wt)). A positive value indicates an increase in binding energy, which is unfavorable.

\* Number of residues located with 3.5 Å from all nine AA ligands and present in a wt PEBP1.

<sup>†</sup> Excluding AAs (energy suffixed with<sup>#</sup>) which are interacting only with AA (lack of residues within 3 Å).

\*\* Average value with standard deviation of 5 runs per value.

**Table S3. Results on AA-binding (to PEBP1 (case 1) or Y176X (case 2)) energetics(a), Related to Figure 6.**

| <b>Protein/<br/>Mutant and<br/>substrate</b> | <b>Run1</b>             | <b>Run2</b>             | <b>Run3</b>             | <b>Run4</b>             | <b>Run5</b>             | <b>Avg change(c)<br/>in binding<br/>energy<br/>compared to<br/>wt PEBP1-AA<br/>(kcal/mol)</b> |
|----------------------------------------------|-------------------------|-------------------------|-------------------------|-------------------------|-------------------------|-----------------------------------------------------------------------------------------------|
| Case 1<br>wtPEBP1 +<br>9AA<br>molecules **   | -5.7 ± 0.5              | -6.2 ± 0.3              | -5.7 ± 0.4              | -5.7 ± 0.5              | -5.4 ± 0.4              |                                                                                               |
|                                              | -5.3 ± 0.2              | -5.6 ± 0.4              | -5.5 ± 0.3              | -5.2 ± 0.1              | -5.4 ± 0.3              |                                                                                               |
|                                              | -5.3 ± 0.1              | -5.2 ± 0.1              | -5.3 ± 0.3              | -5.6 ± 0.3              | -5.3 ± 0.2              |                                                                                               |
|                                              | -4.8 ± 0.1 <sup>†</sup> | -4.8 ± 0.2              | -5.2 ± 0.3              | -4.3 ± 0.4 <sup>†</sup> | -4.8 ± 0.2              |                                                                                               |
|                                              | -4.5 ± 0.4              | -4.5 ± 0.1              | -4.8 ± 0.3              | -4.4 ± 0.4              | -4.4 ± 0.3              |                                                                                               |
|                                              | -4.5 ± 0.2 <sup>†</sup> | -4.5 ± 0.3              | -4.2 ± 0.2              | -4.1 ± 0.4              | -4.5 ± 0.4              |                                                                                               |
|                                              | -4.6 ± 0.2 <sup>†</sup> | -4.3 ± 0.2              | -4.3 ± 0.3 <sup>#</sup> | -4.3 ± 0.3              | -4.2 ± 0.2 <sup>#</sup> |                                                                                               |
|                                              | -4.4 ± 0.3              | -4.6 ± 0.4 <sup>#</sup> | -4.2 ± 0.2              | -4.3 ± 0.3 <sup>#</sup> | -4.5 ± 0.3              |                                                                                               |
| -4.1 ± 0.3                                   | -4.4 ± 0.3              | -4.5 ± 0.3              | -4.2 ± 0.3              | -4.3 ± 0.2              |                         |                                                                                               |
| <b>Total ΔG(b)<br/>(kcal/mol)</b>            | <b>-29.5 ± 2.3</b>      | <b>-39.5 ± 2.3</b>      | <b>-39.4 ± 2.6</b>      | <b>-33.5 ± 3.0</b>      | <b>-38.6 ± 2.5</b>      | <b>ΔΔG (kcal/mol)<br/>0</b>                                                                   |
| Case 2<br>Y176X + 9AA<br>molecules **        | -5.4 ± 0.4              | -5.4 ± 0.1              | -5.3 ± 0.4              | -5.1 ± 0.1              | -5.2 ± 0.1              |                                                                                               |
|                                              | -5.4 ± 0.2              | -5.3 ± 0.3              | -5.4 ± 0.3              | -5.4 ± 0.3              | -5.8 ± 0.4              |                                                                                               |
|                                              | -4.4 ± 0.2              | -4.8 ± 0.1              | -4.3 ± 0.1              | -4.5 ± 0.1              | -4.5 ± 0.3 <sup>†</sup> |                                                                                               |
|                                              | -4.7 ± 0.2              | -5.1 ± 0.2 <sup>†</sup> | -4.7 ± 0.3              | -5.0 ± 0.4              | -5.0 ± 0.3 <sup>†</sup> |                                                                                               |
|                                              | -4.7 ± 0.1              | -4.6 ± 0.3              | -5.0 ± 0.1              | -4.8 ± 0.2 <sup>†</sup> | -5.1 ± 0.1 <sup>†</sup> |                                                                                               |
|                                              | -5.0 ± 0.5              | -4.5 ± 0.1 <sup>#</sup> | -4.8 ± 0.5              | -4.5 ± 0.1 <sup>†</sup> | -5.0 ± 0.2              |                                                                                               |
|                                              | -5.0 ± 0.4 <sup>†</sup> | -4.1 ± 0.3              | -4.7 ± 0.4 <sup>#</sup> | -4.2 ± 0.2 <sup>†</sup> | -4.5 ± 0.3              |                                                                                               |
|                                              | -4.8 ± 0.4 <sup>†</sup> | -4.3 ± 0.4              | -4.1 ± 0.3 <sup>#</sup> | -4.5 ± 0.4 <sup>†</sup> | -4.4 ± 0.5 <sup>#</sup> |                                                                                               |
| -4.5 ± 0.2 <sup>†</sup>                      | -4.4 ± 0.5              | -4.4 ± 0.4 <sup>#</sup> | -4.7 ± 0.2 <sup>#</sup> | -4.6 ± 0.4              |                         |                                                                                               |
| <b>Total ΔG<br/>(kcal/mol) (b)</b>           | <b>29.1 ± 2.6</b>       | <b>-32.9 ± 2.3</b>      | <b>-29.5 ± 2.8</b>      | <b>-20.0 ± 2.0</b>      | <b>-25.1 ± 2.6</b>      | <b>ΔΔG (kcal/mol)<br/>9.76</b>                                                                |

(a) The entries in the table show the interaction energy between wt PEBP1 or Y176X mutant PEBP1 and AA molecules, upon binding one small molecule at a time, up to 9 molecules binding. #refer to interactions of AA molecules with previously bound AA molecules; † refers the same, except for the involvement of 1 PEBP1 residues.

(b) Total ΔG is obtained by summing up all the black entries in the corresponding run.

(c) Average change in free energy, relative to that obtained for the wt PEBP1 + 9 AA molecules.

\*\* Average value with standard deviation of 5 runs per value.
